# Supplementary material for: The charge transfer effect on SERS in a gold-decorated surface defect anatase nanosheet/methylene blue (MB) system
Source: Royal Society of Chemistry journal article supplement (doi:10.1039/d1nj03941e), 2021-01-01
Supplement: d1nj03941e1.pdf [file d1nj03941e1.pdf]

1 The Charge Transfer Effect on SERS in a Gold-decorated Surface Defect  
2 Anatase Nanosheet/ Methylene Blue (MB) system

3 Chang Li<sup>a\*</sup>, Chuanqiang Wu<sup>b</sup>, Ke Zhang<sup>c\*</sup>, Mingqiang Chen<sup>a</sup>, Yishuang Wang<sup>a</sup>, Jingjing Shi<sup>a</sup>, Zhiyuan  
4 Tang<sup>a</sup>

5 <sup>a</sup> Analytical and testing center, School of Chemical Engineering, School of Earth Science and  
6 Environmental Engineering, Anhui University of Science and Technology, 232001, Huainan, China

7 <sup>b</sup> Information Materials and Intelligent Sensing Laboratory of Anhui Province, Key Laboratory of  
8 Structure and Functional Regulation of Hybrid Materials of Ministry of Education, Institutes of  
9 Physical Science and Information Technology, Anhui University, Hefei, 230601, China

10 <sup>c</sup> School of Chemistry and Chemical Engineering, Shanghai Jiao Tong University, Shanghai, 200240,  
11 China

12

13 E-mail address: [cli@aust.edu.cn](mailto:cli@aust.edu.cn)

14

15 **S1 The morphology of anatase nanosheets on silicon wafers**

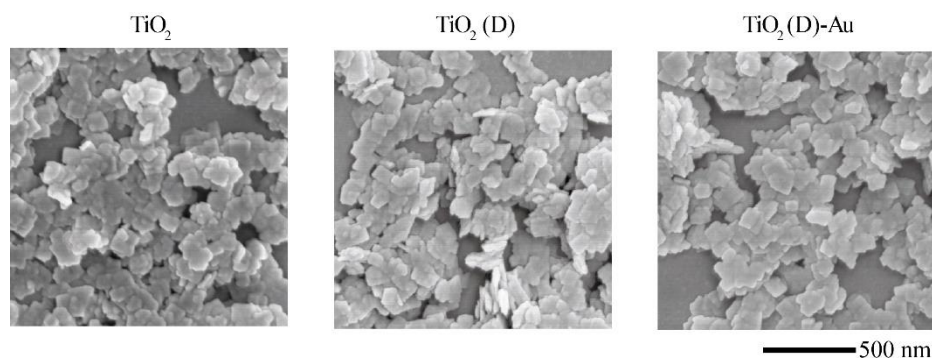

16

17 **Supplementary Figure 1** SEM images of TiO<sub>2</sub>, TiO<sub>2</sub>(D) and TiO<sub>2</sub>(D)-Au on silicon wafers.

18

19 **S2 Calculation of enhancement factor.**

20

21 The EF was calculated following the formula<sup>[s1]</sup>:

22

$$EF = (I_{SERS}/N_{SERS})/(I_{bulk}/N_{bulk}) \quad (1)$$

23

$$N_{SERS} = CVN_A A_{Raman}/A_{Sub} \quad (2)$$

24

$$N_{bulk} = \rho h N_A A_{Raman}/M \quad (3)$$

25

26 Here,  $I_{SERS}$  and  $I_{bulk}$  were the intensities of the selected Raman Peak in SERS (Supplementary Figure  
27 2) and non-SERS spectra (Supplementary Figure 3), and  $N_{SERS}$  and  $N_{bulk}$  were the average number of  
28 MB molecules in the scattering area for SERS and non-SERS measurement. The intensities of Raman  
29 were obtained by taking average of 10 spots on one sample. The  $I_{bulk}$  as reference was got using MB  
30 (0.05 M) dispersed on Si wafer at the same condition following SERS sample preparation. The  $N_{SERS}$   
can be estimated using equation (2) with the molar concentration of the analyte solution ( $C$ ), volume  
of the droplet ( $V$ ), Avogadro constant ( $N_A$ ) and the laser spot area ( $A_{Raman}$ , 1  $\mu\text{m}$  in diameter). The  $N_{bulk}$

31 can be calculated using equation (3). The confocal depth ( $h$ ) of the laser beam is 21  $\mu\text{m}$  and  $M$  is the  
 32 molecular weight,  $\rho$  is the density of bulk MB.

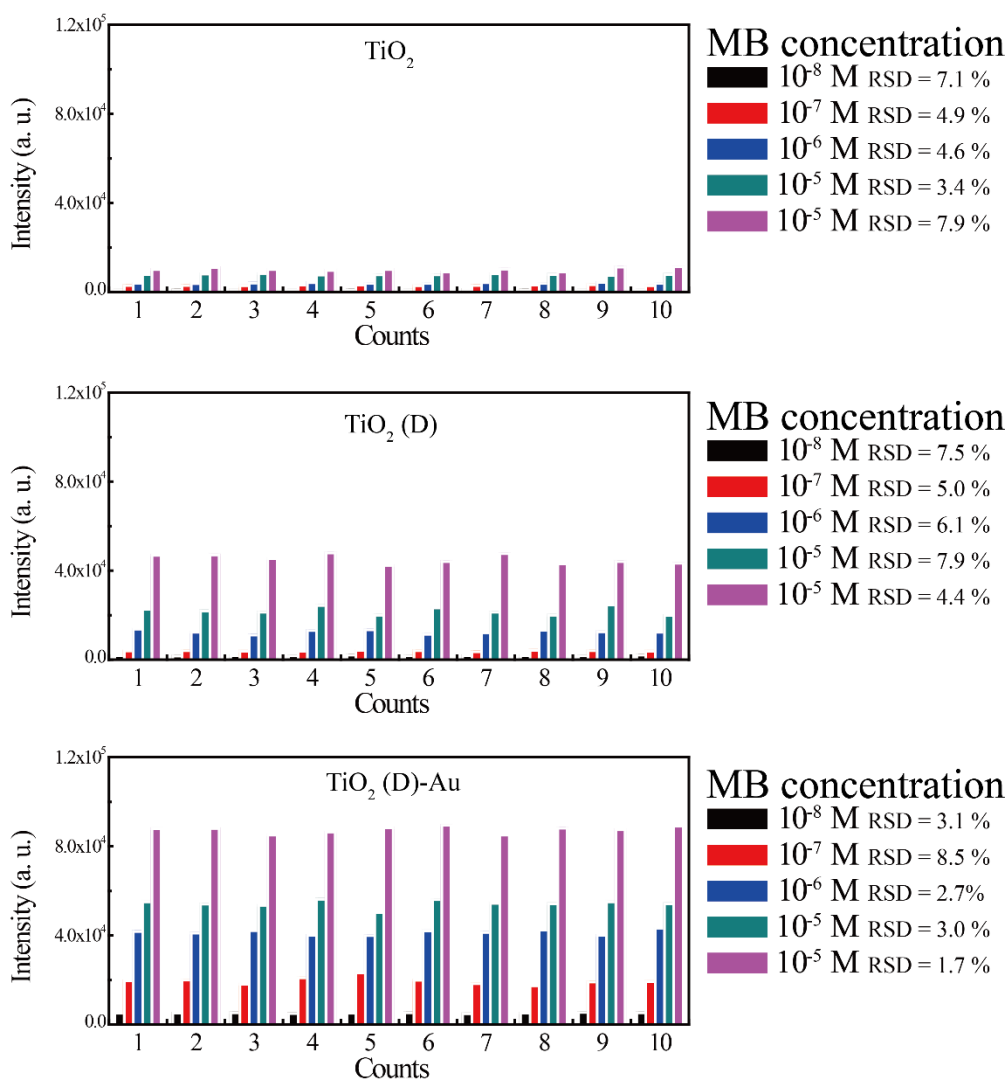

33  
 34 **supplementary Figure 2** the intensity of peak 1621  $\text{cm}^{-1}$  on different SERS substrates with 10 different areas for  
 35 each sample.  
 36

### 37 Reference

38  
 39 S1. Cong, S.;Yuan, Y.;Chen, Z.;Hou, J.;Yang, M.;Su, Y.;Zhang, Y.;Li, L.;Li, Q.; Geng, F. Noble metal-comparable  
 40 SERS enhancement from semiconducting metal oxides by making oxygen vacancies. *Nature communications* **2015**,  
 41 *6*, 1-7.  
 42
